# Supplementary material
Source: PubMed Central journal article supplement (PMC6376274)
Supplement: EMBJ-38-e99708-s001.pdf [file EMBJ-38-e99708-s001.pdf]

# **The pseudokinase TRIB1 toggles an intramolecular switch to regulate COP1 nuclear export**

**Jennifer E. Kung and Natalia Jura**

## **Appendix Table of Contents**

Figure S1. Controls for TRIB1 localization and western blots of protein expression levels.

Figure S2. Controls for GFP-tagged construct localization and western blots of protein expression levels.

Table S1. Coevolution of COP1 pseudosubstrate latch and COP1-binding motifs in Tribbles, ETS transcription factors, and c-Jun.

Figure Legends

## Appendix Figure Legends

### Figure S1. Controls for TRIB1 localization and western blots of protein expression levels.

**(A)** Representative images of COS7, Huh7, and HEK293 cells expressing the indicated TRIB1-FLAG construct (red). Cells were stained with anti-FLAG (Sigma) and anti-mouse Alexa Fluor 568. Nuclei were counterstained with DAPI (blue).

**(B), (C), (D), (E)** Western blots showing expression levels of constructs transfected in Figures 1A, EV1C, EV1E, and EV1G.

**(F)** Western blots showing expression levels of endogenous COP1, TRIB1, TRIB2, TRIB3, C/EBP $\alpha$ , and CRM1. Two different antibodies were used to detect COP1. COP1 (rabbit) refers to the anti-COP1 antibody from Bethyl, while COP1 (mouse) refers to that from Abcam.

### Figure S2. Controls for GFP-tagged construct localization and western blots of protein expression levels.

**(A)** Representative images of COS7 expressing indicated GFP-tagged constructs (green) Nuclei were counterstained with DAPI (blue).

**(B)** Western blots showing expression levels of constructs transfected in Figures 2A.

# Appendix Figure S1.

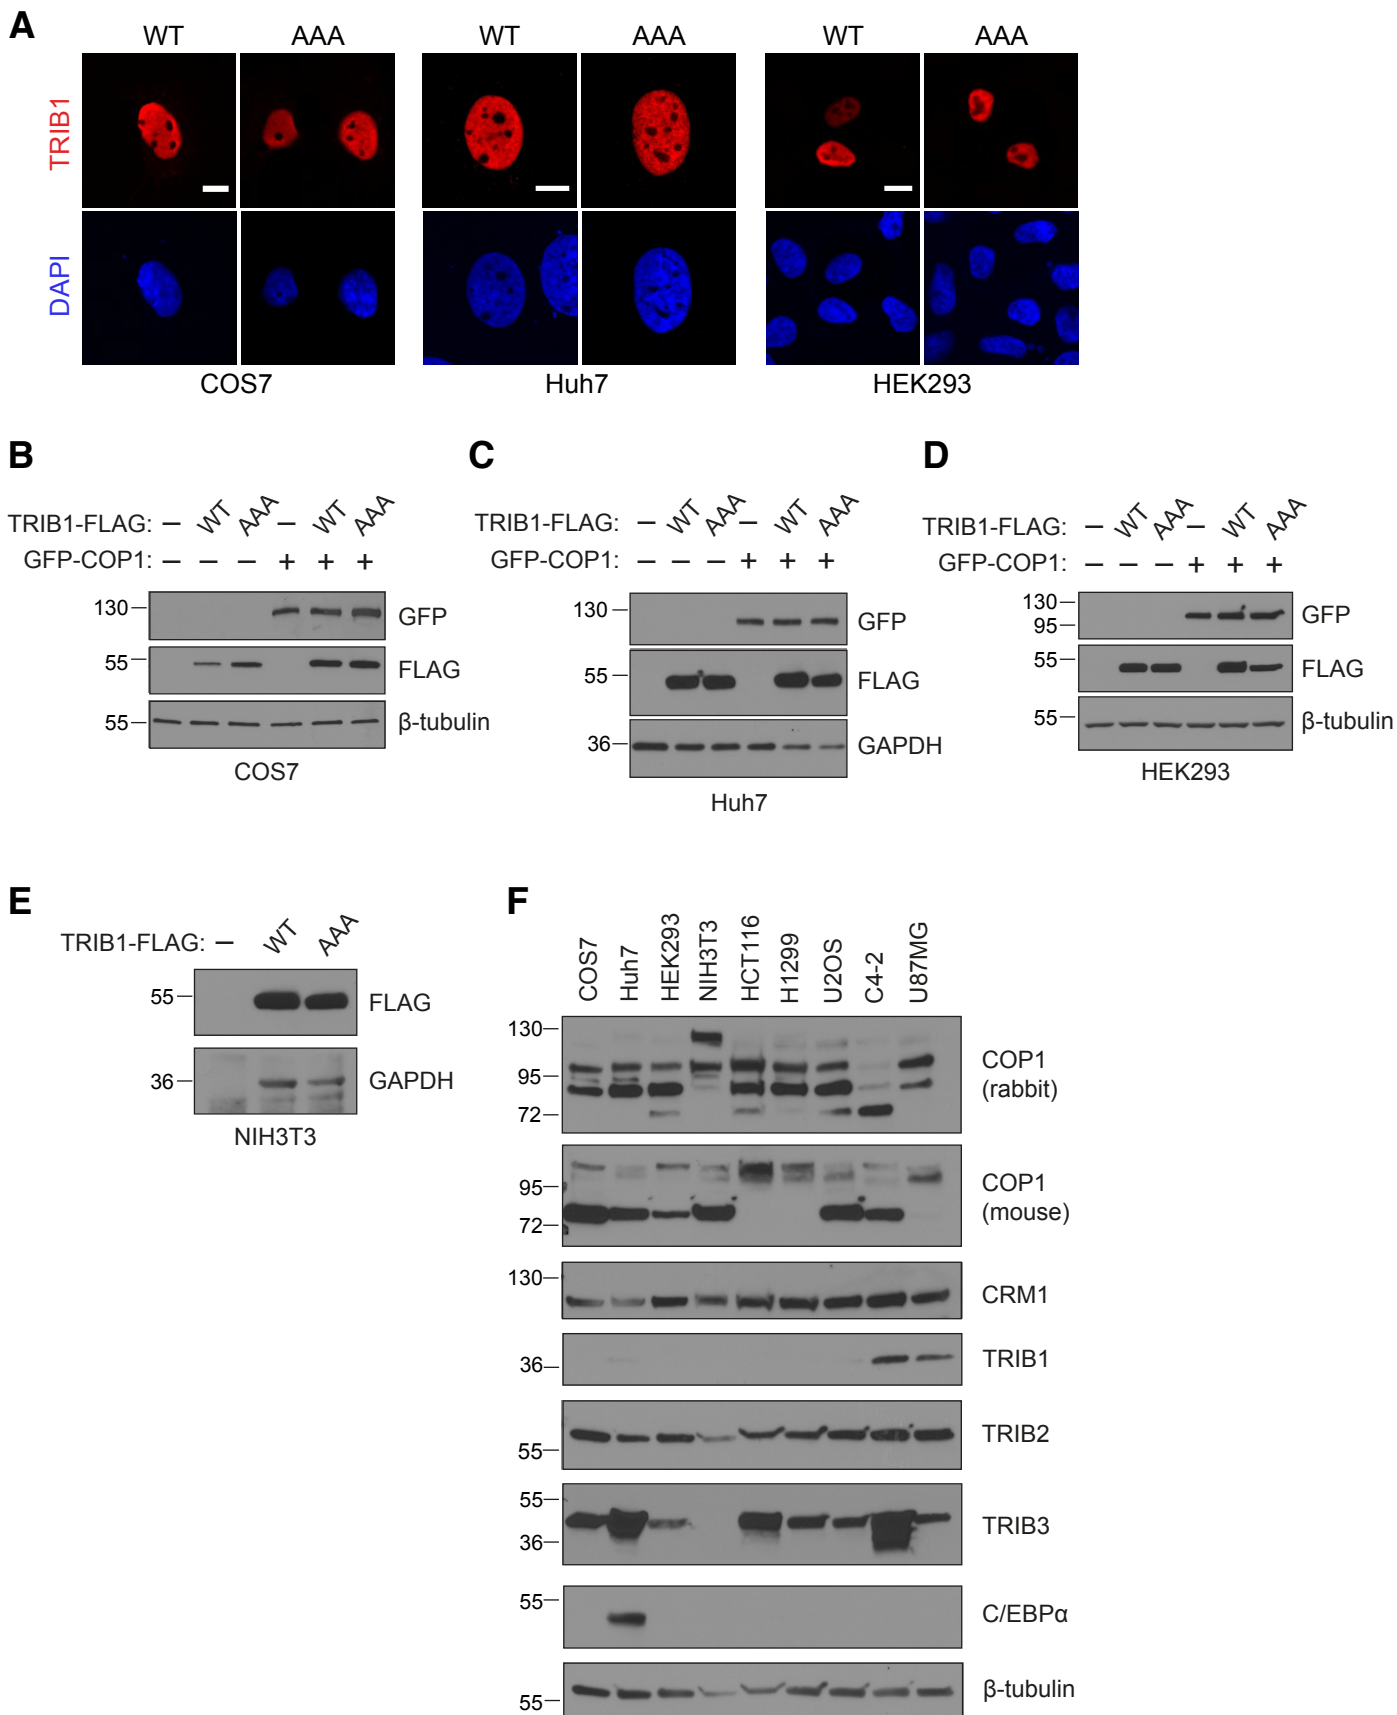

## Appendix Figure S2.

**A**

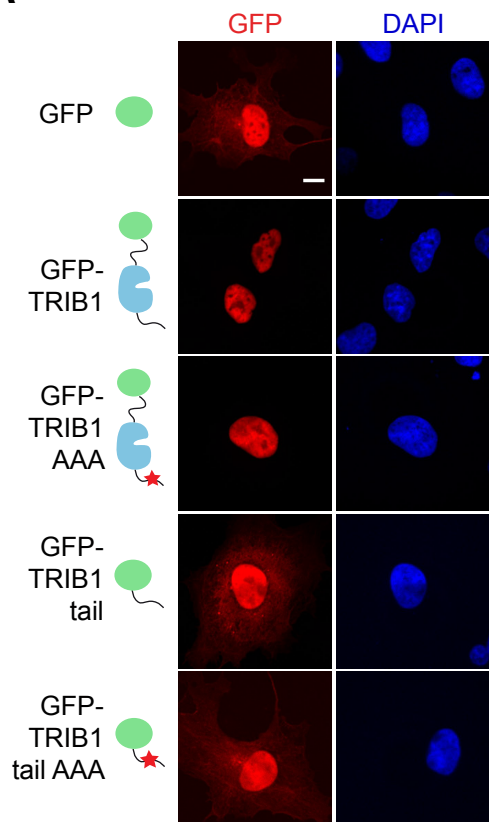

**B**

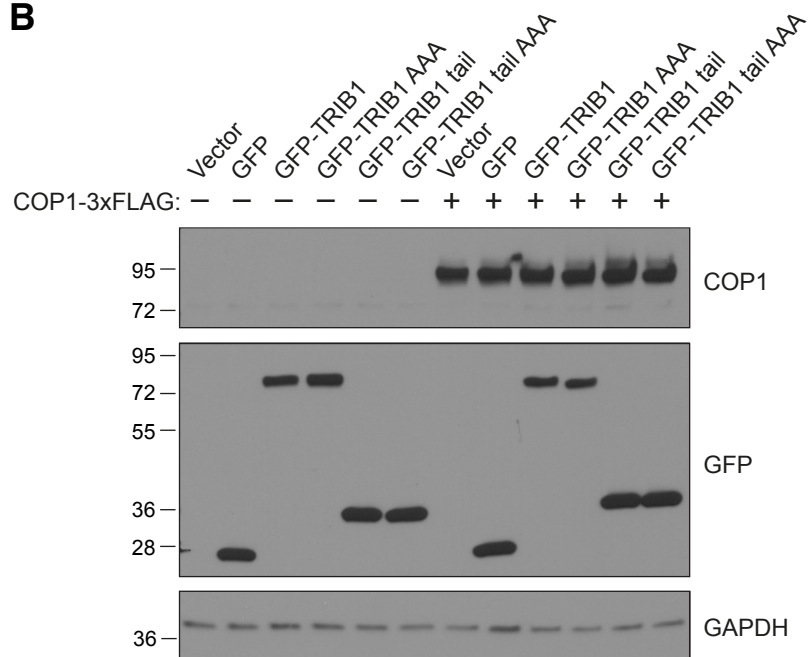

**Appendix Table S1. Coevolution of COP1 pseudosubstrate latch and COP1-binding motifs in Tribbles, ETS transcription factors, and c-Jun.**

| Species                             | Clade       | PSL | Tribbles | ETS | c-Jun |
|-------------------------------------|-------------|-----|----------|-----|-------|
| <i>Aedes aegypti</i>                | Arthropoda  | Y   | Y        | Y   | N     |
| <i>Agrilus planipennis</i>          | Arthropoda  | Y   | Y        | Y   | Y     |
| <i>Amblyomma aureolatum</i>         | Arthropoda  | N   | Y        | N/A | Y     |
| <i>Anopheles darlingi</i>           | Arthropoda  | Y   | Y        | Y   | Y     |
| <i>Atta colombica</i>               | Arthropoda  | N   | Y        | Y   | Y     |
| <i>Cerapachys biroi</i>             | Arthropoda  | N   | Y        | Y   | Y     |
| <i>Corethrella appendiculata</i>    | Arthropoda  | N   | Y        | Y   | Y     |
| <i>Culex quinquefasciatus</i>       | Arthropoda  | Y   | Y        | Y   | Y     |
| <i>Daphnia magna</i>                | Arthropoda  | N   | Y        | Y   | N     |
| <i>Dufourea novaeangliae</i>        | Arthropoda  | N   | Y        | Y   | Y     |
| <i>Habropoda laboriosa</i>          | Arthropoda  | N   | Y        | Y   | Y     |
| <i>Harpegnathos saltator</i>        | Arthropoda  | N   | Y        | Y   | Y     |
| <i>Hyalomma excavatum</i>           | Arthropoda  | N   | Y        | N/A | Y     |
| <i>Lasius niger</i>                 | Arthropoda  | N   | Y        | Y   | Y     |
| <i>Lygus hesperus</i>               | Arthropoda  | Y   | Y        | Y   | Y     |
| <i>Nyssomyia neivai</i>             | Arthropoda  | Y   | Y        | N/A | N/A   |
| <i>Orchesella cincta</i>            | Arthropoda  | N   | Y        | Y   | N/A   |
| <i>Papilio xuthus</i>               | Arthropoda  | N   | Y        | Y   | Y     |
| <i>Rhipicephalus appendiculatus</i> | Arthropoda  | N   | Y        | Y   | Y     |
| <i>Trachymyrmex cornetzi</i>        | Arthropoda  | N   | Y        | Y   | Y     |
| <i>Triatoma dimidiata</i>           | Arthropoda  | N   | Y        | N/A | Y     |
| <i>Tribolium castaneum</i>          | Arthropoda  | N   | Y        | Y   | Y     |
| <i>Zootermopsis nevadensis</i>      | Arthropoda  | Y   | Y        | Y   | Y     |
| <i>Lingula unguis</i>               | Brachiopoda | N   | Y        | Y   | Y     |
| <i>Micromonas commoda</i>           | Chlorophyta | N   | N/A      | N/A | N/A   |
| <i>Ailuropoda melanoleuca</i>       | Chordata    | Y   | Y        | Y   | Y     |
| <i>Alligator mississippiensis</i>   | Chordata    | Y   | Y        | Y   | Y     |
| <i>Anolis carolinensis</i>          | Chordata    | Y   | Y        | Y   | Y     |
| <i>Aphyosemion striatum</i>         | Chordata    | Y   | Y        | Y   | N/A   |
| <i>Bos taurus</i>                   | Chordata    | Y   | Y        | Y   | Y     |
| <i>Callithrix jacchus</i>           | Chordata    | Y   | Y        | Y   | Y     |
| <i>Canis lupus familiaris</i>       | Chordata    | Y   | Y        | Y   | Y     |
| <i>Cavia porcellus</i>              | Chordata    | Y   | Y        | Y   | Y     |
| <i>Chlorocebus sabaeus</i>          | Chordata    | Y   | Y        | Y   | Y     |
| <i>Danio rerio</i>                  | Chordata    | Y   | Y        | Y   | Y     |
| <i>Ficedula albicollis</i>          | Chordata    | Y   | Y        | Y   | Y     |
| <i>Fundulus heteroclitus</i>        | Chordata    | Y   | Y        | Y   | Y     |

|                              |              |   |     |     |     |
|------------------------------|--------------|---|-----|-----|-----|
| Gallus gallus                | Chordata     | Y | Y   | Y   | Y   |
| Homo sapiens                 | Chordata     | Y | Y   | Y   | Y   |
| Latimeria chalumnae          | Chordata     | Y | Y   | Y   | Y   |
| Loxodonta africana           | Chordata     | Y | Y   | Y   | Y   |
| Macaca mulatta               | Chordata     | Y | Y   | Y   | Y   |
| Monodelphis domestica        | Chordata     | Y | Y   | Y   | Y   |
| Mus musculus                 | Chordata     | Y | Y   | Y   | Y   |
| Myotis davidii               | Chordata     | Y | Y   | Y   | Y   |
| Nomascus leucogenys          | Chordata     | Y | Y   | Y   | Y   |
| Nothobranchius furzeri       | Chordata     | Y | Y   | Y   | Y   |
| Oreochromis niloticus        | Chordata     | Y | Y   | Y   | Y   |
| Oryctolagus cuniculus        | Chordata     | Y | Y   | Y   | Y   |
| Oryzias latipes              | Chordata     | Y | Y   | Y   | Y   |
| Otolemur garnettii           | Chordata     | Y | Y   | Y   | Y   |
| Ovis aries                   | Chordata     | Y | Y   | Y   | Y   |
| Pan troglodytes              | Chordata     | Y | Y   | Y   | Y   |
| Papio anubis                 | Chordata     | Y | Y   | Y   | Y   |
| Patagioenas fasciata monilis | Chordata     | Y | Y   | Y   | Y   |
| Pongo abelii                 | Chordata     | Y | Y   | Y   | Y   |
| Rattus norvegicus            | Chordata     | Y | Y   | Y   | Y   |
| Salmo salar                  | Chordata     | Y | Y   | Y   | Y   |
| Scleropages formosus         | Chordata     | Y | Y   | Y   | Y   |
| Taeniopygia guttata          | Chordata     | Y | Y   | Y   | Y   |
| Takifugu rubripes            | Chordata     | Y | Y   | Y   | Y   |
| Xenopus tropicalis           | Chordata     | Y | Y   | Y   | Y   |
| Hydra vulgaris               | Cnidaria     | Y | Y   | Y   | Y   |
| Choanephora cucurbitarum     | Mucoromycota | N | N/A | N/A | N/A |
| Ascaris suum                 | Nematoda     | Y | Y   | Y   | Y   |
| Toxocara canis               | Nematoda     | Y | N   | Y   | Y   |
| Cyanidioschyzon merolae      | Rhodophyta   | N | N/A | N/A | N/A |
| Galdieria sulphuraria        | Rhodophyta   | N | N/A | N/A | N/A |
| Hypsibius dujardini          | Tardigrada   | Y | Y   | Y   | Y   |
| Ananas comosus               | Tracheophyta | N | N/A | N/A | N/A |
| Anthurium amnicola           | Tracheophyta | N | N/A | N/A | N/A |
| Arabidopsis thaliana         | Tracheophyta | N | N/A | N/A | N/A |
| Arabis alpina                | Tracheophyta | N | N/A | N/A | N/A |
| Brassica napus               | Tracheophyta | N | N/A | N/A | N/A |
| Cajanus cajan                | Tracheophyta | N | N/A | N/A | N/A |
| Capsicum annum               | Tracheophyta | N | N/A | N/A | N/A |
| Cicer arietinum              | Tracheophyta | N | N/A | N/A | N/A |
| Cucumis melo                 | Tracheophyta | N | N/A | N/A | N/A |

|                                        |               |   |     |     |     |
|----------------------------------------|---------------|---|-----|-----|-----|
| Dichanthelium oligosanthes             | Tracheophyta  | N | N/A | N/A | N/A |
| Fragaria ananassa                      | Tracheophyta  | N | N/A | N/A | N/A |
| Glycine soja                           | Tracheophyta  | N | N/A | N/A | N/A |
| Gossypium hirsutum                     | Tracheophyta  | N | N/A | N/A | N/A |
| Ipomoea nil                            | Tracheophyta  | N | N/A | N/A | N/A |
| Lilium formosanum x Lilium longiflorum | Tracheophyta  | Y | N/A | N/A | N/A |
| Medicago truncatula                    | Tracheophyta  | N | N/A | N/A | N/A |
| Morus notabilis                        | Tracheophyta  | N | N/A | N/A | N/A |
| Nelumbo nucifera                       | Tracheophyta  | N | N/A | N/A | N/A |
| Nicotiana glauca                       | Tracheophyta  | N | N/A | N/A | N/A |
| Noccaea caerulea                       | Tracheophyta  | N | N/A | N/A | N/A |
| Oryza sativa subsp. japonica           | Tracheophyta  | N | N/A | N/A | N/A |
| Pisum sativum                          | Tracheophyta  | N | N/A | N/A | N/A |
| Populus trichocarpa                    | Tracheophyta  | N | N/A | N/A | N/A |
| Ricinus communis                       | Tracheophyta  | N | N/A | N/A | N/A |
| Rosa hybrid cultivar                   | Tracheophyta  | N | N/A | N/A | N/A |
| Selaginella moellendorffii             | Tracheophyta  | Y | N/A | N/A | N/A |
| Solanum lycopersicum                   | Tracheophyta  | N | N/A | N/A | N/A |
| Vigna radiata var. radiata             | Tracheophyta  | N | N/A | N/A | N/A |
| Vitis vinifera                         | Tracheophyta  | N | N/A | N/A | N/A |
| Zea mays                               | Tracheophyta  | N | N/A | N/A | N/A |
| Zancudomyces culisetae                 | Zoopagomycota | N | N/A | N/A | N/A |
